# Supplementary material for: A novel extended flipped classroom model helps dental undergraduates blossom into dentists
Source: Research Square preprint supplement (doi:10.21203/rs.3.rs-7475241/v1), 2025-09-24
Supplement: Supplementary file 1 [file cba856aa67af1058c275342b.pdf]

### Questionnaire of Students' Learning Satisfaction

| Categories | (1-5 Likert scale, where 1=Strongly Disagree to 5=Strongly Agree)                                  | The score |
|------------|----------------------------------------------------------------------------------------------------|-----------|
| 1          | Do you perceive the course content as comprehensible?                                              |           |
| 2          | Do you consider the course content beneficial for your disciplinary development?                   |           |
| 3          | How would you rate the level of engagement stimulated by the course content?                       |           |
| 4          | Do you actively engage in classroom pedagogical activities?                                        |           |
| 5          | Is the instructional delivery aligned with the predetermined curriculum schedule?                  |           |
| 6          | Are you satisfied with the pedagogical methodologies employed in this course?                      |           |
| 7          | How would you evaluate the adequacy of instructional materials utilized in this course?            |           |
| 8          | Do you consider the assessment framework of this course to be appropriate?                         |           |
| 9          | Do you perceive the in-class learning environment as conducive to academic engagement?             |           |
| 10         | How would you assess the adequacy of extracurricular learning support systems?                     |           |
| 11         | Do you find the self-regulated learning strategies implemented in this course effective?           |           |
| 12         | Are you satisfied with the instructional design architecture of this course?                       |           |
| 13         | How would you rate the quality of teacher-student interaction in this course?                      |           |
| 14         | Has this course enhanced your academic self-efficacy and learning autonomy?                        |           |
| 15         | Do you believe this course has enabled you to acquire clinical oral examination competencies?      |           |
| 16         | Have you developed diagnostic proficiency for oral pathologies through this course?                |           |
| 17         | Have you attained treatment plan formulation skills through this instructional program?            |           |
| 18         | Has this course improved your capacity for independent scholarship?                                |           |
| 19         | Do you perceive enhanced critical thinking skills in clinical decision-making through this course? |           |
| 20         | Recommendations for course improvement: (Qualitative response)                                     |           |
